# Supplementary material
Source: PubMed Central journal article supplement (PMC4887344)
Supplement: NIHMS752617-supplement-Supp_Fig_S1-S5.pdf [file NIHMS752617-supplement-Supp_Fig_S1-S5.pdf]

## ***New Phytologist* Supporting Information**

Article title: **Cool nighttime temperatures induce the expression of *CONSTANS* and *FLOWERING LOCUS T* to regulate flowering in *Arabidopsis***

Authors: Hannah A. Kinmonth-Schultz, Xinran Tong, Jae Lee, Young Hun Song, Shogo Ito, Soo-Hyung Kim and Takato Imaizumi

Article acceptance date: 06 January 2016

The following Supporting Information is available for this article:

**Fig. S1** Transcript accumulation levels of *ISOPENTENYL PYROPHOSPHATE/DIMETHYLALLYL PYROPHOSPHATE ISOMERASE (IPP2)* remain unaltered over the day across three temperature treatments.

**Fig. S2** Growth is delayed and *FLOWERING LOCUS T (FT)* level is depressed in seedlings exposed to constant 12°C temperatures.

**Fig. S3** Growth is delayed and *FLOWERING LOCUS T (FT)* level is reduced in seedlings exposed to constant 17°C temperatures.

**Fig. S4** *CONSTANS (CO)* protein stabilization is not altered during the cool night.

**Fig. S5** Proposed mechanism for the transcriptional regulation of *FLOWERING LOCUS T (FT)* in long days with temperature changes.

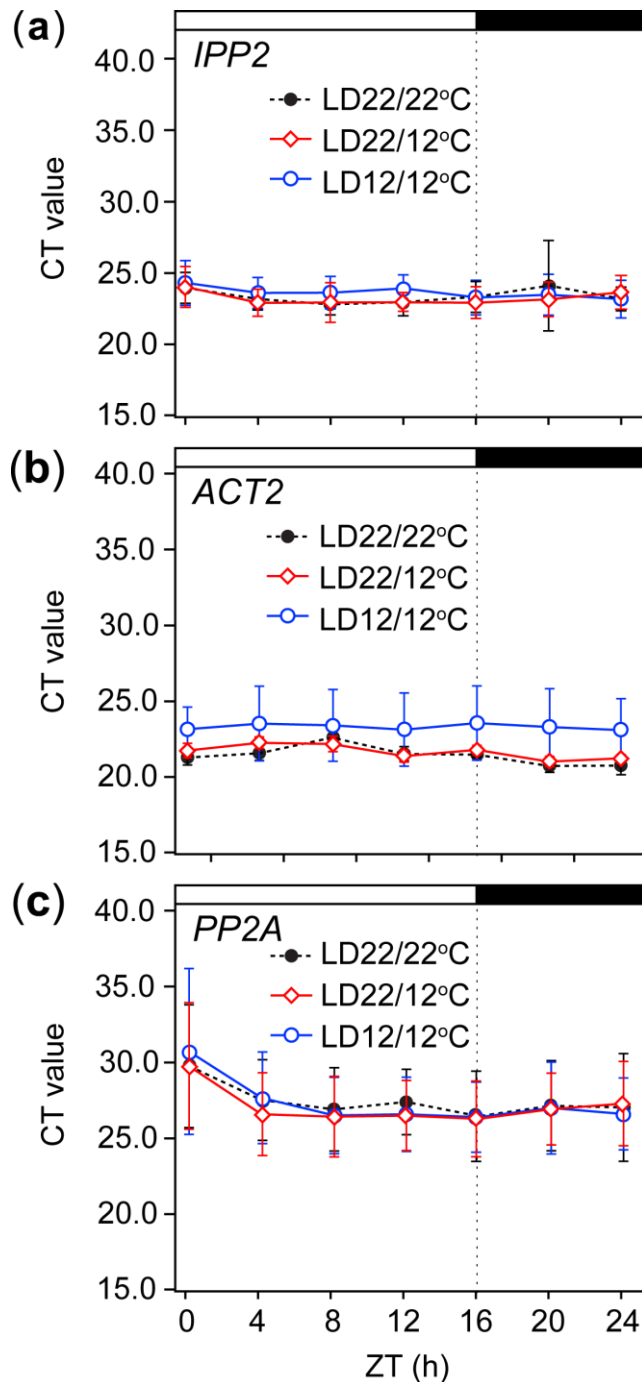

**Fig. S1** Transcript accumulation levels of *ISOPENTENYL PYROPHOSPHATE/DIMETHYLALLYL PYROPHOSPHATE ISOMERASE* (*IPP2*) remain unaltered over the day across three temperature treatments. (a, b, c) Transcript accumulation patterns of *IPP2*, *ACTIN 2* (*ACT2*), and *SERINE/THREONINE PROTEIN PHOSPHATASE 2A* (*PP2A*) in 11-d-old Col-0 plants in LD22/22°C (long days with day : night temperatures = 22°C : 22°C), LD22/12°C, and LD12/12°C conditions. Seedlings were grown for 7 d in short-day conditions before being transferred to LD temperature treatments. Data represent means  $\pm$  SEM derived from three biological replicates. Topmost white and black bars designate day and night, respectively. Dotted vertical lines are times of lights off.

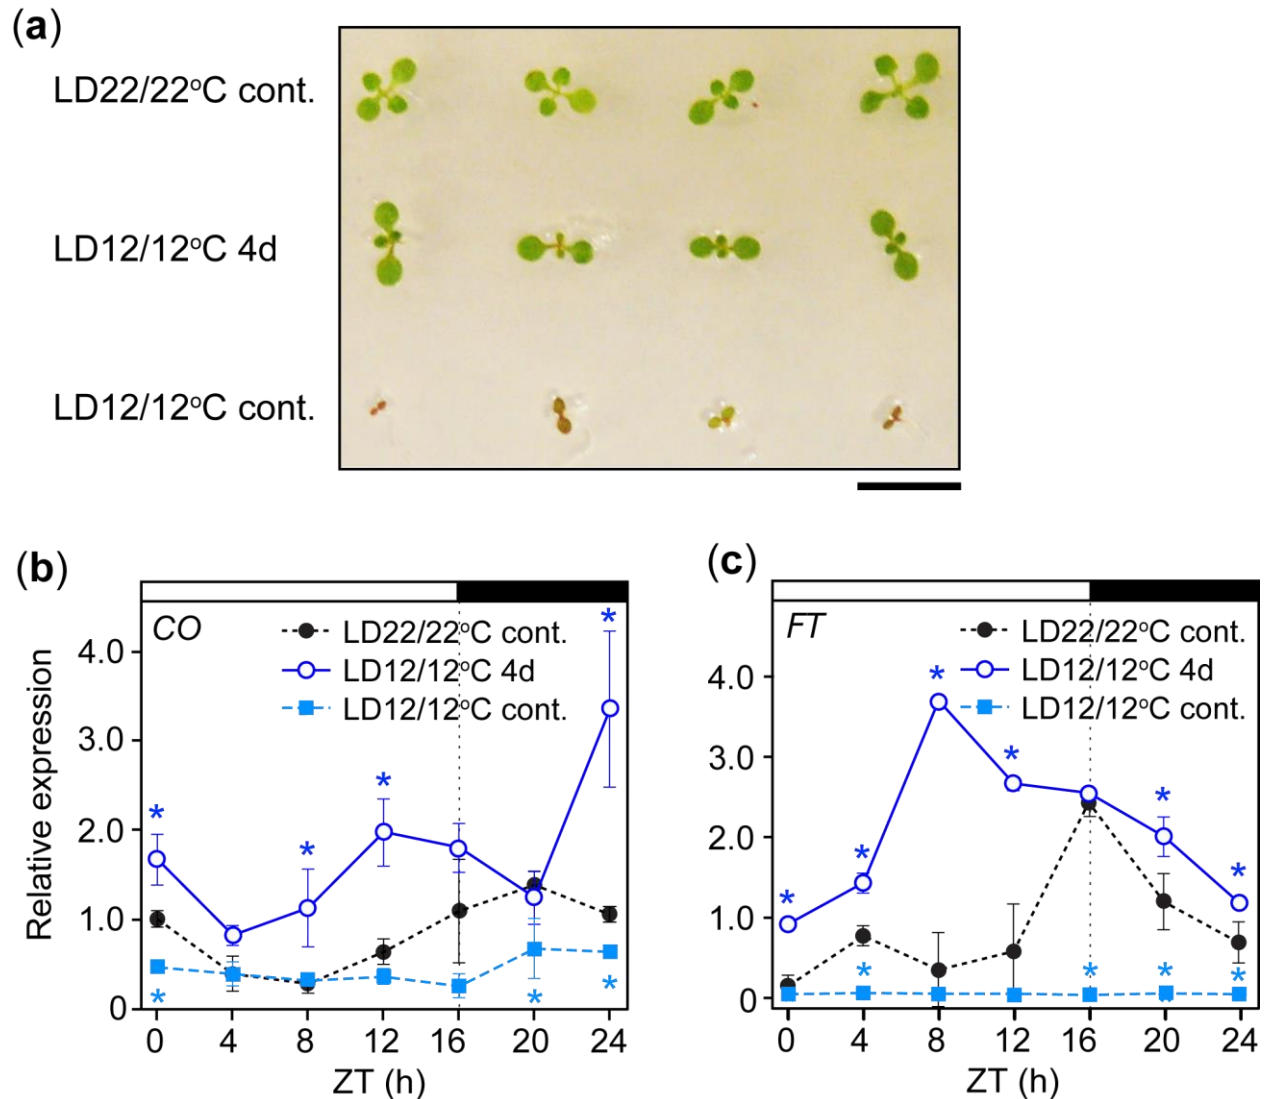

**Fig. S2** Growth is delayed and *FLOWERING LOCUS T* (*FT*) level is depressed in seedlings exposed to constant 12°C temperatures. Transcript accumulation patterns of *FT* and *CONSTANS* (*CO*) are very low in seedlings exposed to cool (12°C) temperatures from seed. (a) Visual comparison of individuals grown from seed in LD22/22°C (long days with day : night temperatures = 22°C : 22°C) and LD12/12°C conditions (cont.), or in LD22/22°C for 7 d then transferred to LD12/12°C for 4 d (4d). Photos taken when seedlings were 12 d old. Scale bar, 1 cm. (b, c) Transcript accumulation patterns of *FT* and *CO* in these conditions. Harvest began at dawn when seedlings were 11 d old. Data represent means  $\pm$  SEM derived from three biological replicates. Asterisks indicate  $P < 0.05$  and 95% CI of difference between pair did not contain zero in statistical comparisons made to the LD22/22°C control. Topmost white and black bars designate day and night, respectively. Dotted vertical lines are times of lights off.

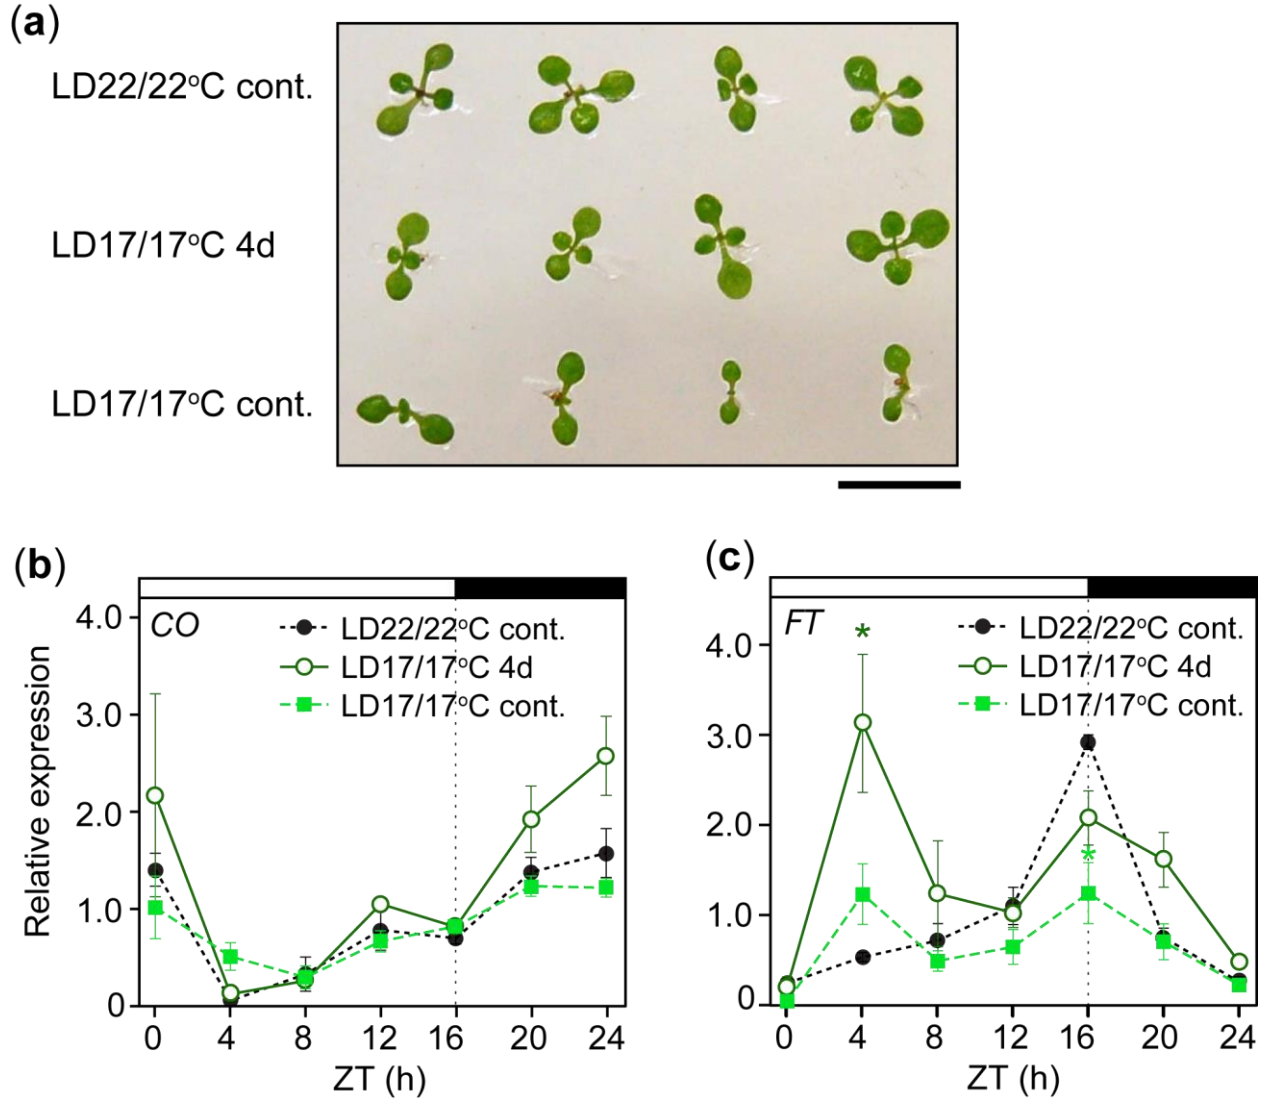

**Fig. S3** Growth is delayed and *FLOWERING LOCUS T* (*FT*) level is reduced in seedlings exposed to constant 17°C temperatures. Transcript accumulation patterns of *FT* is reduced in seedlings exposed to cool (17°C) temperatures from seed. (a) Visual comparison of individuals grown from seed in LD22/22°C (long days with day : night temperatures = 22°C : 22°C) and LD17/17°C conditions (cont.), or in LD22/22°C for 7 d then transferred to LD17/17°C for 4 d (4d). Photos taken when seedlings were 12 days old. Scale bar, 1 cm. (b, c) Transcript accumulation patterns of *FT* and *CONSTANS* (*CO*) in these conditions. Harvest began at dawn when seedlings were 11 d old. Data represent means  $\pm$  SEM derived from three biological replicates. Asterisks indicate  $P < 0.05$  and 95% CI of difference between pair did not contain zero in statistical comparisons made to the LD22/22°C control. Topmost white and black bars designate day and night, respectively. Dotted vertical lines are times of lights off.

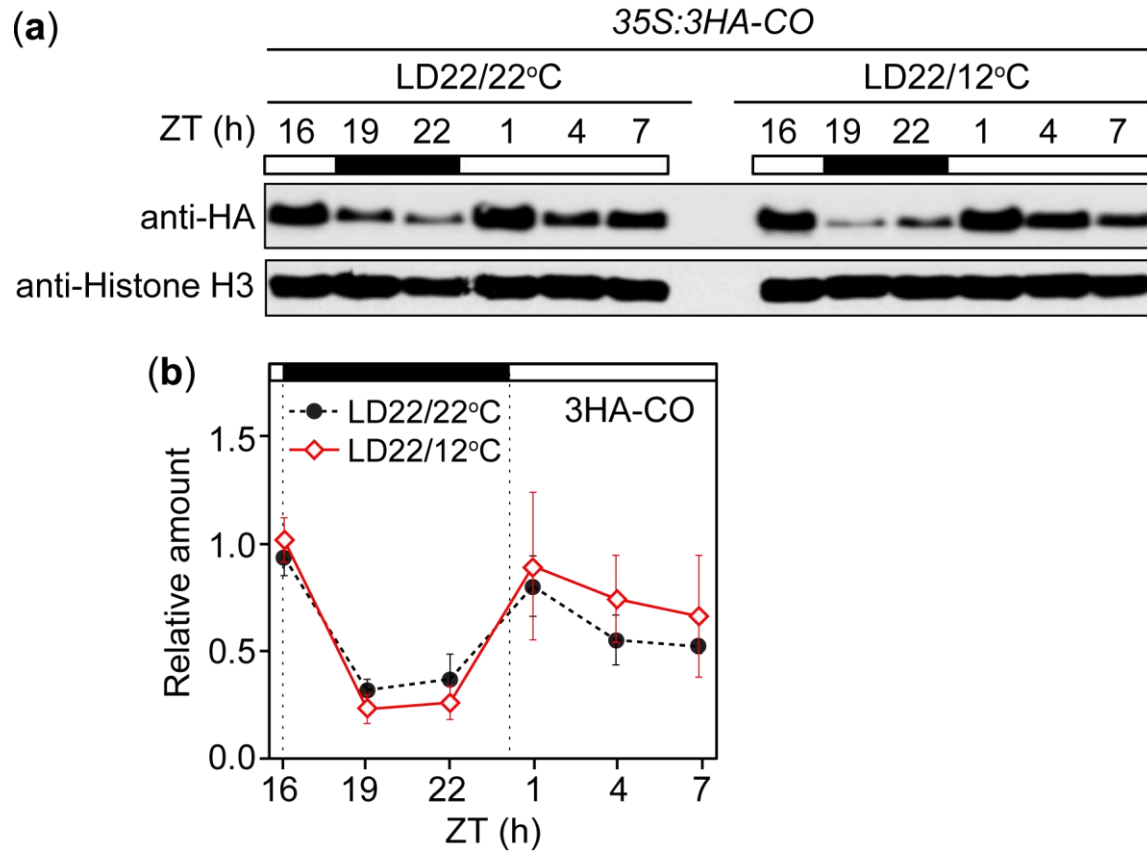

**Fig. S4** CONSTANS (CO) protein stabilization is not altered during the cool night. (a, b) Accumulation patterns (a) and quantification (b) of 3HA-CO proteins in *35S:HA-CO* plants grown in LD22/22°C (long days with day : night temperatures = 22°C : 22°C) and LD22/12°C conditions. Histone H3 serves as a loading control. Data represent means  $\pm$  SEM derived from three biological replicates. Topmost white and black bars designate day and night, respectively. Dotted vertical lines are times of lights off.

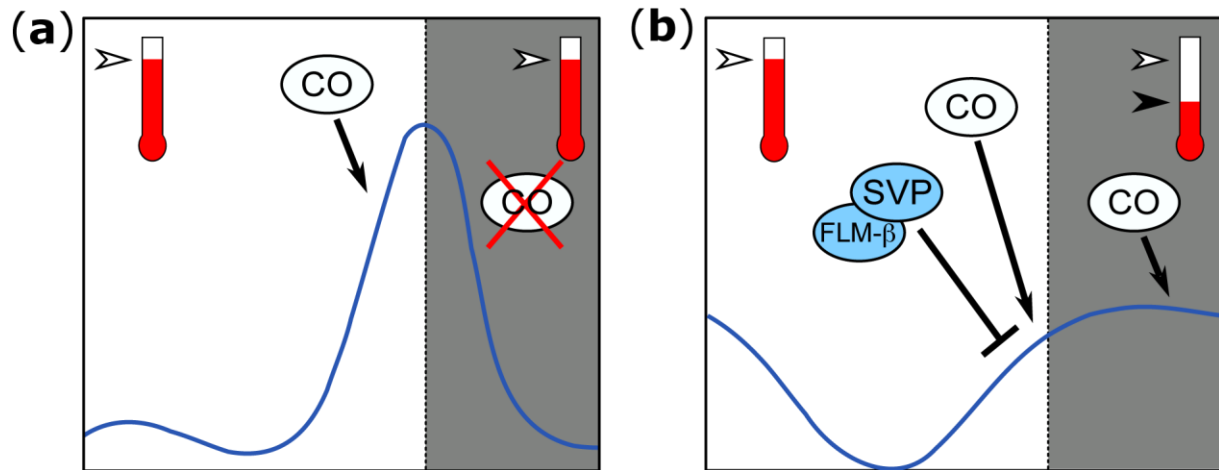

**Fig. S5** Proposed mechanism for the transcriptional regulation of *FLOWERING LOCUS T* (*FT*) in long days with temperature changes. (a) As previously shown, *CONSTANS* (*CO*) protein is stabilized in the afternoon of long days and induces *FT* transcript accumulation. (b) When warm/cool temperature cycles are imposed over long days, *SHORT VEGITATIVE PHASE* (*SVP*) in conjunction with *FLOWERING LOCUS M* (*FLM*)- $\beta$  suppresses *FT* at the end of the light period, whereas more *CO* protein is present at night (gray box) and induces *FT* transcript accumulation.
